# Supplementary material for: Structural diversity of coordination polymers controlled by the metal ion as the sole reaction variable
Source: Royal Society of Chemistry journal article supplement (doi:10.1039/c5ce00349k), 2015-01-01
Supplement: c5ce00349k1.pdf [file c5ce00349k1.pdf]

**Supporting Information for**

**Structural Diversity of Coordination Polymer Controlled by Metal Ion as the  
Sole Reaction Variable**

Jie Bai, Hao-Long Zhou, Pei-Qin Liao, Wei-Xiong Zhang,\* and Xiao-Ming Chen

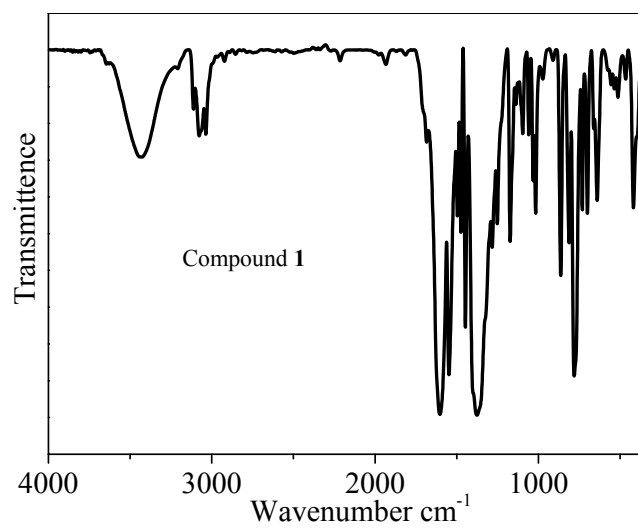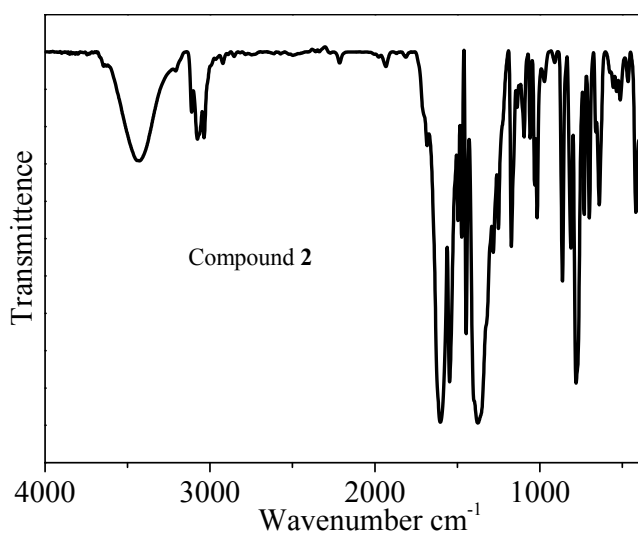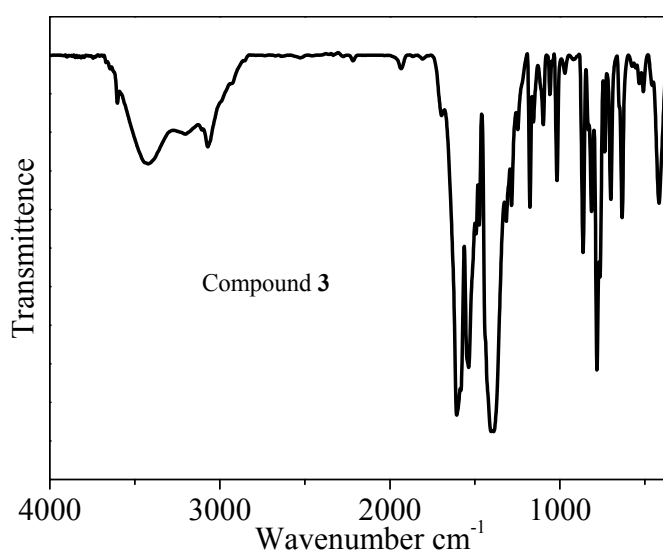

**Fig. S1** IR spectra of compounds 1–3.

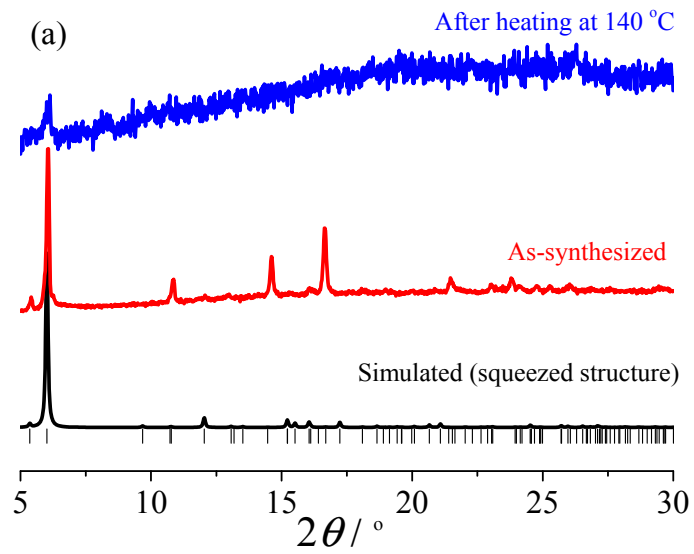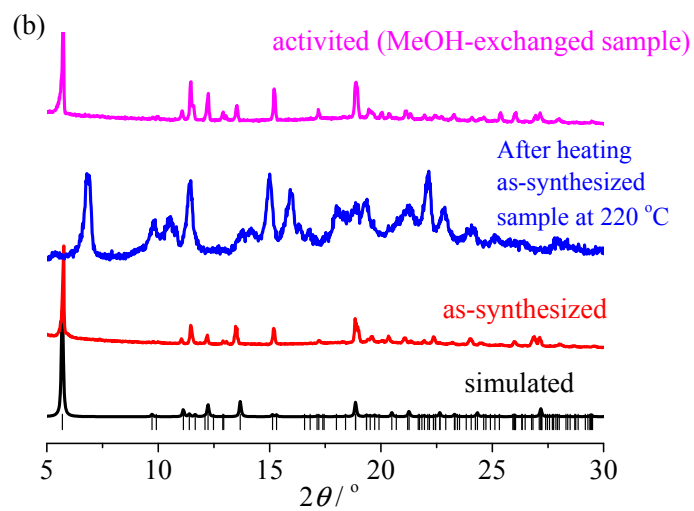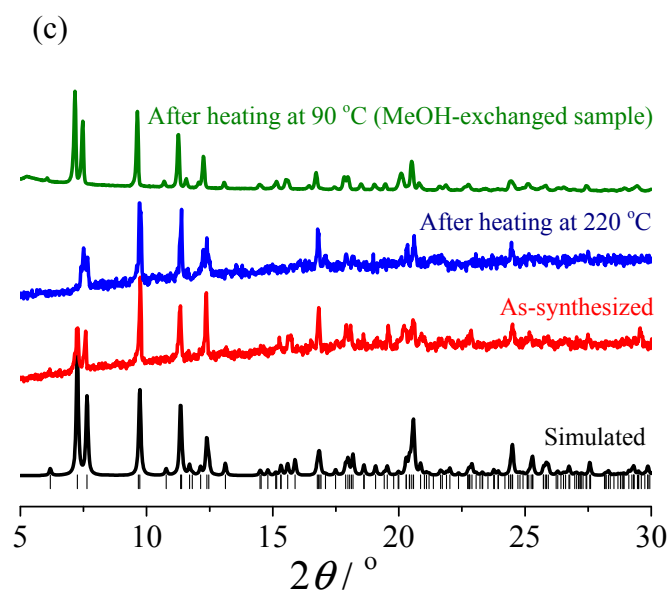

Fig. S2 PXR D patterns of (a)1, (b)2 and (c)3.
